# Supplementary material for: Phylogenetic relationships of the HA and NA genes between vaccine and seasonal influenza A(H3N2) strains in Korea
Source: PubMed Central journal article supplement (PMC5336230; doi:10.1371/journal.pone.0172059), 2017-03-03
Supplement: pone.0172059.s002.pdf [file pone.0172059.s002.pdf]

1 **S1 Table. The number of seasonal influenza virus isolates during the 2010/11-2013/14**  
 2 **seasons.**

| Virus | The number of viral isolates at a given season (%) |               |               |              |
|-------|----------------------------------------------------|---------------|---------------|--------------|
|       | 2010/11                                            | 2011/12       | 2012/13       | 2013/14      |
| H1N1  | 1,551 (78.69)                                      | 1 (0.03)      | 331 (19.52)   | 345 (16.62)  |
| H3N2  | 405 (20.55)                                        | 1,935 (51.49) | 1,270 (74.88) | 628 (30.25)  |
| B     | 15 (0.76)                                          | 1,822 (48.48) | 95 (5.60)     | 1103 (53.13) |
| Total | 1,971 (100)                                        | 3,758 (100)   | 1,696 (100)   | 2,076 (100)  |

3
