# Supplementary material for: Phylogenetic relationships of the HA and NA genes between vaccine and seasonal influenza A(H3N2) strains in Korea
Source: PubMed Central journal article supplement (PMC5336230; doi:10.1371/journal.pone.0172059), 2017-03-03
Supplement: pone.0172059.s003.pdf [file pone.0172059.s003.pdf]

1 **S2 Table. Pearson correlation coefficients between ILI cases and the number of seasonal**  
2 **influenza isolates in Korea.**

| Virus | Correlation coefficient |                   |         |         |
|-------|-------------------------|-------------------|---------|---------|
|       | 2010/11                 | 2011/12           | 2012/13 | 2013/14 |
| H1N1  | 0.921                   | n.d. <sup>a</sup> | 0.726   | 0.693   |
| H3N2  | 0.516                   | 0.868             | 0.976   | 0.954   |
| B     | n.d.                    | 0.988             | n.d.    | 0.805   |

3 <sup>a</sup>Not determined due to the limited number of isolated cases of H1N1 (2011/12 season) or B  
4 (2010/11 and 2012/13 seasons) virus.
